# Supplementary material
Source: publisher site journal article supplement (https://www.dovepress.com/article/425617)
Supplement: Supplementary file 1 [file get_supplementary_file.php]

**SUPPORTING INFORMATION**

**List of Independent Ethics Committees/Institutional Review Boards**

- Komisja Bioetyczna przy Okręgowej Warmińsko-Mazurskiej Izbie Lekarskiej Ul. Żołnierska 16c, 10-561 Olsztyn, Poland
- Komisja Bioetyczna przy Świętokrzyskiej Izbie Lekarskiej Ul. Wojska Polskiego 52, 25-389 Kielce, Poland
- Komisja Bioetyczna przy Collegium Medicum im. Ludwika Rydygiera Ul. M. Skłodowskiej-Curie 9, 85-094 Bydgoszcz, Poland
- Komisja Bioetyczna Uniwersytetu Jagiellońskiego Ul. Grzegórzecka 20, 31-531 Kraków, Poland
- Komisja Bioetyczna przy Okręgowej Radzie Lekarskiej Wielkopolskiej Izby Lekarskiej Ul. Nowowiejskiego 51, 61 - 734 Poznań, Poland
- Komisja Bioetyczna przy Akademii Medycznej Al. Racławickie 1, 20-950 Lublin, Poland
- Ethik-Kommission Universitatsklinikum Jena Bachstrasse 18, 07743 Jena, Deutschland
- St. Code Geneesmiddelenreclame Postbus 9087, 1006 AB AMSTERDAM, The Netherlands
- Eticka Komise FN v Motole V úvalu 84, 150 06 Praha 5, Motol, Czech Republic
- Eticka Komise Masarykova nem. v Ústí nad Labem Sociální péče 3316/12A 401 13 Ústí nad Labem, Serbia
- University Child Clinic Tirsova 10, 11000 Belgrade, Serbia
- Clinical Center of Kragujevac Zmaj Jovina 30, 34000 Kragujevac, Serbia
- The Ethics Commission of SE “Institute of Emergency and Reactivate Surgery Named After V.K.Gusaka of NAMS in Ukraine”, Hematology Department Donetsk, 47 Lenisnky prospect, 83045 Ukraine

**Supplementary Figure 1** Study Design. **Abbreviations:** ED, exposure day; T, time in months.


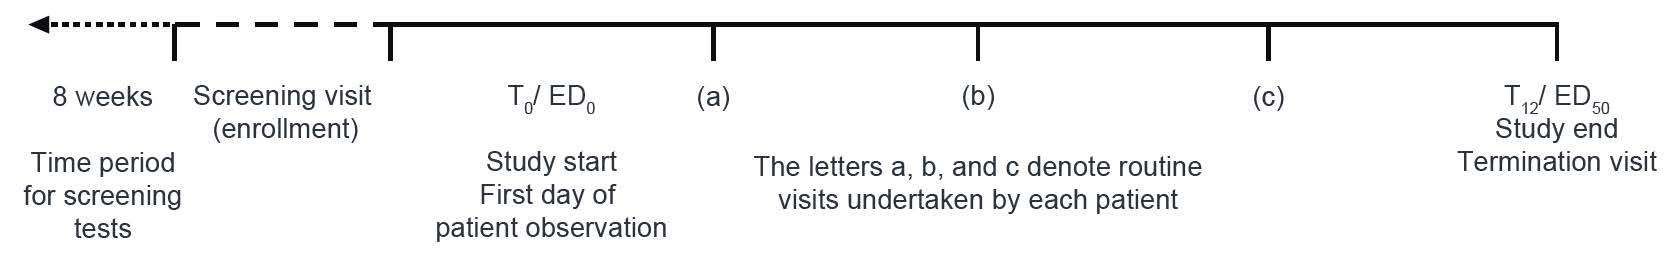


**Supplementary Table 1** Hemostatic Efficacy Ratings

| Efficacy Rating | Definition |
| --- | --- |
| Excellent | Meets or exceeds efficacy expectations based on experience with previous FIX therapy  Bleed episodes typically respond to the same or a fewer number of infusions and the same or lower dose of FIX compared with previous on-demand therapy, and/or the rate of breakthrough bleeding while receiving prophylaxis is the same or lower than with previous FIX therapy, if applicable |
| Good | Somewhat less than expected, but adequate efficacy compared with previous FIX therapy  Most bleed episodes respond to the same number of infusions and dose, but some require more infusions or higher dose than previously expected, and/or a minor increase in the rate of breakthrough bleeding while receiving prophylaxis, if applicable |
| Fair | Significantly less than expected efficacy compared with previous FIX therapy  Bleed episodes most often require more infusions and/or higher doses than expected with previous therapy, and/or adequate breakthrough bleed prevention requires more frequent infusions and/or higher doses while receiving prophylaxis, if applicable |
| Poor | Routine failure to control hemostasis, and/or requiring additional agents or different FIX therapeutics for hemostatic management |

**Abbreviation:** FIX, factor IX.

**Supplementary Table 2** Maximal FIX Inhibitor titer in 10 Patientsa,b (Safety Set)

| Assay | Patients, n (%) | 95% CI |
| --- | --- | --- |
| Bethesda assay |  |  |
| Max. titer >5 BU | 0 (0) | 0.00–32.44 |
| 1 BU < max. titer ≤5 BU | 0 (0) | 0.00–32.44 |
| Max. titer ≤1 BU | 8 (100) | 67.56–100.00 |
| Nijmegen assay |  |  |
| Max. titer >5 Nij | 0 (0) | 0.00–48.99 |
| 0.6 Nij < max. titer ≤5 Nij | 0 (0) | 0.00–48.99 |
| Max. titer ≤0.6 Nij | 4 (100) | 51.01–100.00 |

**Abbreviations:** BU, Bethesda units; CI, confidence interval; FIX, factor IX; max., maximum; Nij, Nijmegen units. aFor 2 patients, FIX inhibitor testing was conducted using both the Bethesda assay and the Nijmegen assay. bOne patient underwent testing for FIX inhibitors twice and was reported as negative both times; however, the method used to test for FIX inhibitors was not reported. This patient is not included in Supplementary Table 2. In addition, inhibitor testing was not conducted in 2 patients.

**Supplementary Table 3** Annualized Bleeding Rate by Treatment Regimen

| Regimen | ITT Set,  N = 13 | | PP Set,  N = 9 | |
| --- | --- | --- | --- | --- |
| **na** | **Mean ± SD** | **na** | **Mean ± SD** |
| Prophylaxis | 11**b** | 4.52 ± 7.02 | 8**c** | 4.22 ± 6.79 |
| Prophylaxis for surgery | 2 | 0 ± 0 | 1 | 0 ± - |
| On-demand | 6 | 118.71 ± 111.83 | 4 | 132.40 ± 120.56 |
| Any regimen | 13 | 40.06 ± 85.96 | 9 | 35.88 ± 89.69 |

**Abbreviations:** ITT, intent to treat; PP, per protocol; SD, standard deviation. aNumber of patients with available study days on regimen. Due to patients switching to another treatment regimen, certain study days were either included or excluded from the observation period. bFor 1 patient receiving prophylaxis, only study days until May 12, 2010 were included in the surveillance period because the patient switched to another product. For 1 patient receiving prophylaxis, study days from April 12, 2010 to August 6, 2010 were excluded from the surveillance period because the patient received another product. For 1 patient receiving prophylaxis, only study days until June 23, 2010 were included in the surveillance period because the patient received another product. For 1 patient receiving prophylaxis, only study days until November 8, 2010 were included in the surveillance period because the patient received another product. cFor 1 patient receiving prophylaxis, only study days until June 23, 2010 were included in the surveillance period because the patient received another product. For 1 patient receiving prophylaxis, only study days until November 8, 2010 were included in the surveillance period because the patient received another product.

**Supplementary Table 4** Annualized Bleeding Rate by Cause of Bleeding Episode

| Cause of Bleeding Episode, mean ± SD | ITT Set,  N = 13a | PP Set,  N = 9b |
| --- | --- | --- |
| Spontaneous | 0.85 ± 1.84 | 1.23 ± 2.13 |
| Traumatic | 1.54 ± 2.92 | 1.70 ± 3.38 |
| Undetermined | 0.16 ± 0.38 | 0.22 ± 0.44 |
| Total | 2.55 ± 4.79 | 3.15 ± 5.64 |

**Note:** Annualized bleeding rate: number of bleedings / [(last study date – date of enrollment +1) / 365.25]. **Abbreviations:** ITT, intent to treat; PP, per protocol; SD, standard deviation.

aDue to patients switching to another product, certain study days were either included or excluded from the surveillance period. For 1 patient receiving prophylaxis, only study days until May 12, 2010 were included. For 1 patient receiving prophylaxis, study days from April 12, 2010 to August 6, 2010 were excluded. For 1 patient receiving prophylaxis, only study days until June 23, 2010 were included. For 1 patient receiving prophylaxis, only study days until November 8, 2010 were included. bFor 1 patient, only study days until June 23, 2010 were included. For 1 patient, only study days until November 8, 2010 were included.

**Supplementary Table 5** Overall Hemostatic Efficacy Rating by Physician at the Termination Visita

| Hemostatic Efficacy Assessment, n (%) | ITT Set,  N = 13 | PP Set,  N = 9 |
| --- | --- | --- |
| Excellent | 2 (15.38) | 2 (22.22) |
| Good | 2 (15.38) | 0 (0) |
| Fair | 0 (0) | 0 (0) |
| Poor | 0 (0) | 0 (0) |
| N/Ab | 9 (69.23) | 7 (77.78) |

**Abbreviations:** ITT, intent to treat; N/A, not available; PP, per protocol. aFor 1 patient, a rating of “good” was reported, but no bleeding episodes were documented. This patient was not included in this table. bPatients did not receive purified factor IX concentrate between the last study visit and termination.

**Supplementary Table 6** Average Total Dose of Study Drug per Kilogram of Body Weight per Bleeding Episode (IU/kg)

|  | ITT Set,  N = 13 | | PP Set,  N = 9 | |
| --- | --- | --- | --- | --- |
| Cause of Bleeding Episode | **Patients, n** | **Mean ± SD** | **Patients, n** | **Mean ± SD** |
| Spontaneous | 3 | 43.64 ± 29.41 | 3 | 43.64 ± 29.41 |
| Traumatic | 5 | 46.78 ± 37.23 | 3 | 31.72 ± 26.00 |
| Undetermined | 1 | 28.30 ± - | 1 | 28.30 ± - |
| Total | 6 | 49.96 ± 33.75 | 4 | 40.25 ± 26.30 |

**Note:** For each patient and cause of bleeding episode, the average total dose was determined as: sum of all bleeding related doses (IU/kg) / number of bleeding episodes. **Abbreviations:** ITT, intent to treat; PP, per protocol; SD, standard deviation.
